# Supplementary material
Source: ML conference proceedings conference paper supplement (https://openaccess.thecvf.com/content/ICCV2025/html/Kichler_Learning_to_See_ICCV_2025_paper.html)
Supplement: Supplementary file 1 [file Kichler_Learning_to_See_ICCV_2025_supplemental.pdf]

# Learning to See Inside Opaque Liquid Containers using Speckle Vibrometry: Supplementary materials

Matan Kichler      Shai Bagon      Mark Sheinin  
Weizmann Institute of Science, Israel

matankic@gmail.com, shai.bagon@weizmann.ac.il, mark.sheinin@weizmann.ac.il

## A. Volume effect on sensed vibration’s SNR

This experiment shows the relation between the sound volume at the container’s surface and the resulting SNR of the recovered vibration. In other words, we aim to assess the minimum threshold amplitude of the excitation at which our system can no longer reliably measure the vibrations. In general, this threshold depends on the container’s size and material. To get a ballpark understanding of this relationship, we used a Coke can positioned 50 cm from a single speaker as a reference. Specifically, we played a single tone at various volumes, recovered the container’s vibration using our system, and measured the sound level at the surface of the Coke can (using a calibrated microphone).

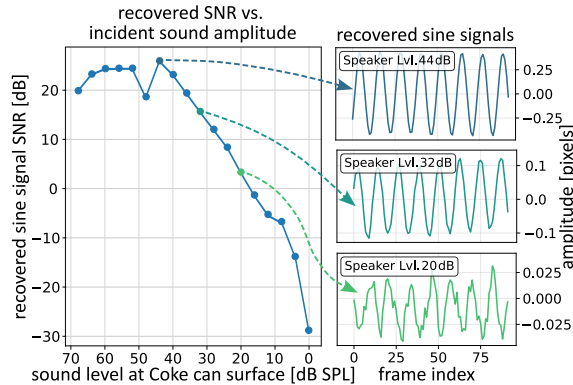

Figure 1. Vibration SNR vs. excitation sound amplitude.

Fig. 1 shows the recovered vibration’s SNR as a function of the sound level measured close to the can’s surface (in dB SPL units). Let  $\text{dB}_{\text{rec.}}$  and  $\text{dB}_{\text{sound}}$  denote the recovered vibration units and the speaker surface level, respectively. The SNR plot remains flat at approximately  $25 \text{ dB}_{\text{rec.}}$  until the sound level reaches about  $40 \text{ dB}_{\text{sound}}$  (typical home noise), beyond which the SNR declines, hitting  $0 \text{ dB}_{\text{SNR}}$  at  $17 \text{ dB}_{\text{sound}}$  of sound. Remarkably, even at  $20 \text{ dB}_{\text{sound}}$  (rustling leaves), the signal is still detectable (around  $3 \text{ dB}_{\text{rec.}}$ ). The recovered signal SNR was computed

using

$$\text{SNR}_{\text{dB}} = 20 \log_{10} \left( \frac{P_{\text{signal}}}{P_{\text{noise}}} \right),$$

where  $P_{\text{signal}}$  is the DFT magnitude of the test tone while  $P_{\text{noise}}$  is the root sum square of the other frequency components (excluding the DC component).

## B. Industrial container experiment

In addition to various everyday drink containers, we evaluated our method on a large industrial water tank weighing about 100 kg when full. We excited the container vibrations using slightly more powerful speakers (see Fig. 5(c) of the main manuscript), which we manually moved to six different locations. To increase the amount of data samples for the single industrial container, we projected the full  $6 \times 6$  laser grid onto the container’s surface and used three columns of points as separate measurements<sup>1</sup>. As with the smaller containers, we recorded vibrations at six discrete fill levels using a chirp, a song segment, and ambient sound. However, no intermediate levels were acquired for this container. Tab. 1 shows the inference result for tests (a) and (d) on the industrial container. These results come from a model trained for 7500 epochs on the full training set, including all other containers in training but omitting speaker position three in the water-tank data (reserved for the within-distribution test) and excluding ambient-sound recordings.

| Test name               | Level Pred. |                | Container<br>Acc. ↑ |
|-------------------------|-------------|----------------|---------------------|
|                         | Acc. ↑      | MAE ↓          |                     |
| (a) within distribution | 1.0000      | 0.0078 ±0.0108 | 1.0000              |
| (d) ambient sound       | 1.0000      | 0.0226 ±0.0631 | 0.9444              |

Table 1. Water-tank experiment.

<sup>1</sup>Each column here had three laser points, in correspondence to the other containers in our dataset

### C. Visualizing the inference results

Here we provide a comprehensive breakdown of our evaluation results across all dataset subsets. First, we visualize the inference process on the different test sets in Figs. 2 and 3. In Fig. 2, the rows of each test visualize the predicted logit values for the given test, while the ground truth fill levels are indicated on the y-axis. For example, the second row of the third column in Fig. 2 shows an erroneous classification of 80% level for a true level of 20%. Fig. 3 shows the in-

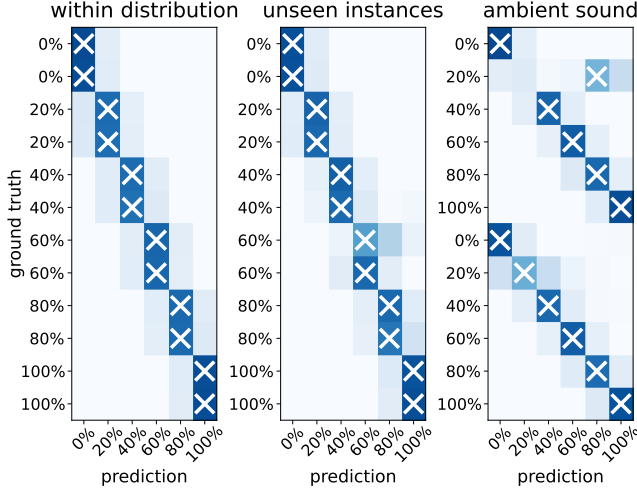

Figure 2. Liquid fill-level prediction for various containers across different test sets: “(a) within-distribution”, “(b) unseen instances”, and “(d) ambient sound”. Each row displays the logits corresponding to a given input. The X sign indicates the argmax of that row.

ference of the liquid level using Eq. (5) of the main paper, which predicts a continuous fill level instead of a discrete one. The predicted continuous liquid level is marked using a red dot, while the true level is marked on the y-axis, as before. Fig. 3(a) shows several successful predictions, while the second row in Fig. 3(b) shows a failure case.

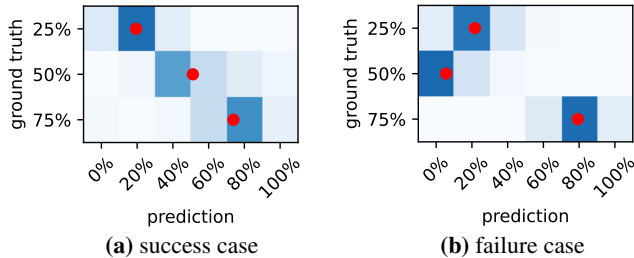

Figure 3. Liquid fill-level prediction for test “(c) unseen liquid levels”. The MAE for this test set is measured with respect to the expected value of the logits, indicated by a red dot in each row. (a) The model approximately manages to interpolate the unseen liquid levels (50 % and 75 %). (b) The model fails to predict the 50 % level in the second row (on a different container).

### D. Detailed liquid-level inference results

Here we provide tables detailing the results on the inference task across our various test sets. The tables report the mean absolute error (MAE) and accuracy for each container type along with the number of samples in each set. Specifically, Tab. 8 details our training set (3,347 samples); Tab. 2 covers the within-distribution subset (694 samples); Tab. 3 reports the unseen instances subset (549 samples); Tab. 4 presents the unseen liquid levels (486 samples); Tab. 5 shows the ambient sound subset (449 samples); Tab. 6 details unseen liquid levels with ambient sound (54 samples); and Tab. 7 lists the unseen instances with ambient sound (61 samples), for a total of 5,640 samples.

In addition, Tab. 9 separately presents additional results of our ablation study, evaluating the performance of the VibrationTransformer when trained using only the bottom or top measurement points.

Finally, we report the performance of VibrationTransformer trained on variations of the input signal  $V_i$ : either by supplementing the magnitude with additional phase information (Tab. 10), or by directly processing the raw complex coefficients of  $V_i$  (Tab 11).

| Container            | #Samp. | Level Pred. |                     | Container<br>Acc.↑ |
|----------------------|--------|-------------|---------------------|--------------------|
|                      |        | Acc.↑       | MAE↓                |                    |
| Shampoo Plastic      | 12     | 1.0000      | 0.0077 $\pm 0.0106$ | 1.0000             |
| Coconut Water Carton | 12     | 1.0000      | 0.0078 $\pm 0.0107$ | 1.0000             |
| Almond Milk Carton   | 6      | 1.0000      | 0.0076 $\pm 0.0106$ | 1.0000             |
| Tomato Juice Carton  | 6      | 1.0000      | 0.0077 $\pm 0.0107$ | 1.0000             |
| Ananas Juice Carton  | 6      | 1.0000      | 0.0077 $\pm 0.0106$ | 1.0000             |
| Rice Milk Carton     | 12     | 1.0000      | 0.0078 $\pm 0.0107$ | 1.0000             |
| Energy Drink         | 12     | 1.0000      | 0.0079 $\pm 0.0109$ | 1.0000             |
| Short Beer Can       | 36     | 1.0000      | 0.0078 $\pm 0.0107$ | 1.0000             |
| Coke Can             | 72     | 1.0000      | 0.0078 $\pm 0.0107$ | 1.0000             |
| Tall Beer Can        | 12     | 1.0000      | 0.0078 $\pm 0.0106$ | 1.0000             |
| Pineapple Nectar Tin | 24     | 1.0000      | 0.0078 $\pm 0.0107$ | 1.0000             |
| Green Tea Plastic    | 24     | 1.0000      | 0.0078 $\pm 0.0107$ | 1.0000             |
| Oil Tin Can          | 6      | 1.0000      | 0.0077 $\pm 0.0107$ | 1.0000             |
| Silver Vacuum flask  | 12     | 0.9167      | 0.0234 $\pm 0.0449$ | 1.0000             |
| Black Vacuum flask   | 6      | 1.0000      | 0.0078 $\pm 0.0109$ | 1.0000             |
| Champagne Glass      | 12     | 0.7500      | 0.0586 $\pm 0.0717$ | 1.0000             |
| Orange Vacuum flask  | 36     | 1.0000      | 0.0078 $\pm 0.0106$ | 1.0000             |
| Pitcher Vacuum flask | 6      | 1.0000      | 0.0079 $\pm 0.0108$ | 1.0000             |
| Conditioner          | 120    | 1.0000      | 0.0078 $\pm 0.0107$ | 1.0000             |
| Oatly                | 60     | 1.0000      | 0.0078 $\pm 0.0107$ | 1.0000             |
| Contigo              | 72     | 1.0000      | 0.0078 $\pm 0.0107$ | 1.0000             |
| Matte Vacuum Flask   | 130    | 0.9385      | 0.0233 $\pm 0.0526$ | 1.0000             |
| Water Tank           | 36     | 1.0000      | 0.0078 $\pm 0.0106$ | 1.0000             |
| Total:               | 730    | 0.9836      | 0.0116 $\pm 0.0279$ | 1.0000             |

Table 2. Detailed results for the “(a) within-distribution” test set. The second column shows the number of samples in the set for each container.

| Container          | #Samp. | Level Pred. |                     | Container<br>Acc.↑ |
|--------------------|--------|-------------|---------------------|--------------------|
|                    |        | Acc.↑       | MAE↓                |                    |
| Coke Can           | 108    | 1.0000      | 0.0077 $\pm 0.0106$ | 1.0000             |
| Conditioner        | 108    | 1.0000      | 0.0078 $\pm 0.0108$ | 1.0000             |
| Oatly              | 108    | 0.6574      | 0.1287 $\pm 0.2103$ | 0.7870             |
| Contigo            | 108    | 0.8426      | 0.0623 $\pm 0.1575$ | 0.9907             |
| Matte Vacuum Flask | 117    | 0.4786      | 0.2392 $\pm 0.2565$ | 0.9829             |
| Total:             | 549    | 0.7905      | 0.0916 $\pm 0.1886$ | 0.9526             |

Table 3. Detailed results for the “(b) unseen instances” test set. The second column shows the number of samples in the set for each container.

| Container            | #Samp. | Level Pred. |                     | Container<br>Acc.↑ |
|----------------------|--------|-------------|---------------------|--------------------|
|                      |        | Acc.↑       | MAE↓                |                    |
| Shampoo Plastic      | 27     | N/A         | 0.1176 $\pm$ 0.1054 | 0.8148             |
| Coconut Water Carton | 27     | N/A         | 0.1813 $\pm$ 0.1027 | 0.8148             |
| Almond Milk Carton   | 27     | N/A         | 0.0773 $\pm$ 0.0338 | 1.0000             |
| Tomato Juice Carton  | 27     | N/A         | 0.0927 $\pm$ 0.0745 | 0.8889             |
| Ananas Juice Carton  | 27     | N/A         | 0.0810 $\pm$ 0.0351 | 0.8519             |
| Rice Milk Carton     | 27     | N/A         | 0.0770 $\pm$ 0.0478 | 0.9259             |
| Energy Drink         | 27     | N/A         | 0.1585 $\pm$ 0.1596 | 0.3704             |
| Short Beer Can       | 27     | N/A         | 0.1163 $\pm$ 0.0594 | 0.6296             |
| Coke Can             | 27     | N/A         | 0.0775 $\pm$ 0.0460 | 0.9259             |
| Tall Beer Can        | 27     | N/A         | 0.1569 $\pm$ 0.1402 | 0.5926             |
| Pineapple Nectar Tin | 27     | N/A         | 0.1560 $\pm$ 0.1099 | 0.7778             |
| Green Tea Plastic    | 27     | N/A         | 0.1054 $\pm$ 0.0578 | 0.6667             |
| Oil Tin Can          | 27     | N/A         | 0.1117 $\pm$ 0.0428 | 0.3704             |
| Silver Vacuum flask  | 27     | N/A         | 0.0709 $\pm$ 0.0249 | 1.0000             |
| Black Vacuum flask   | 27     | N/A         | 0.1621 $\pm$ 0.2024 | 1.0000             |
| Champagne Glass      | 27     | N/A         | 0.1316 $\pm$ 0.0767 | 1.0000             |
| Orange Vacuum flask  | 27     | N/A         | 0.1575 $\pm$ 0.2157 | 1.0000             |
| Pitcher Vacuum flask | 27     | N/A         | 0.0683 $\pm$ 0.0314 | 1.0000             |
| Total:               | 486    | N/A         | 0.1167 $\pm$ 0.1104 | 0.8128             |

Table 4. Detailed results for the “(c) unseen liquid levels” test set. The second column shows the number of samples in the set for each container.

| Container            | #Samp. | Level Pred. |                     | Container<br>Acc.↑ |
|----------------------|--------|-------------|---------------------|--------------------|
|                      |        | Acc.↑       | MAE↓                |                    |
| Shampoo Plastic      | 12     | 1.0000      | 0.0077 $\pm$ 0.0104 | 1.0000             |
| Coconut Water Carton | 12     | 1.0000      | 0.0140 $\pm$ 0.0207 | 1.0000             |
| Almond Milk Carton   | 6      | 1.0000      | 0.0191 $\pm$ 0.0249 | 1.0000             |
| Tomato Juice Carton  | 6      | 1.0000      | 0.0081 $\pm$ 0.0104 | 1.0000             |
| Ananas Juice Carton  | 6      | 0.8333      | 0.0411 $\pm$ 0.0717 | 0.6667             |
| Rice Milk Carton     | 6      | 0.6667      | 0.0740 $\pm$ 0.0880 | 1.0000             |
| Energy Drink         | 6      | 1.0000      | 0.0078 $\pm$ 0.0107 | 1.0000             |
| Short Beer Can       | 18     | 1.0000      | 0.0091 $\pm$ 0.0111 | 1.0000             |
| Coke Can             | 72     | 1.0000      | 0.0078 $\pm$ 0.0107 | 1.0000             |
| Tall Beer Can        | 6      | 1.0000      | 0.0078 $\pm$ 0.0107 | 0.8333             |
| Pineapple Nectar Tin | 12     | 1.0000      | 0.0079 $\pm$ 0.0107 | 0.9167             |
| Green Tea Plastic    | 12     | 1.0000      | 0.0128 $\pm$ 0.0178 | 1.0000             |
| Oil Tin Can          | 6      | 1.0000      | 0.0075 $\pm$ 0.0105 | 1.0000             |
| Silver Vacuum flask  | 12     | 0.7500      | 0.0709 $\pm$ 0.1419 | 1.0000             |
| Black Vacuum flask   | 6      | 1.0000      | 0.0078 $\pm$ 0.0108 | 1.0000             |
| Champagne Glass      | 6      | 0.3333      | 0.2011 $\pm$ 0.2635 | 0.8333             |
| Orange Vacuum flask  | 18     | 1.0000      | 0.0077 $\pm$ 0.0107 | 1.0000             |
| Pitcher Vacuum flask | 6      | 1.0000      | 0.0078 $\pm$ 0.0106 | 1.0000             |
| Conditioner          | 60     | 0.9167      | 0.0208 $\pm$ 0.0476 | 0.9667             |
| Oatly                | 60     | 0.9500      | 0.0282 $\pm$ 0.0858 | 0.9333             |
| Contigo              | 36     | 1.0000      | 0.0077 $\pm$ 0.0106 | 1.0000             |
| Matte Vacuum Flask   | 65     | 0.6769      | 0.1483 $\pm$ 0.2468 | 0.9846             |
| Water Tank           | 18     | 1.0000      | 0.0132 $\pm$ 0.0229 | 0.8889             |
| Total:               | 467    | 0.9165      | 0.0377 $\pm$ 0.1183 | 0.9700             |

Table 5. Detailed results for the “(d) ambient sound” test set. The second column shows the number of samples in the set for each container.

| Container            | #Samp. | Level Pred. |                     | Container<br>Acc.↑ |
|----------------------|--------|-------------|---------------------|--------------------|
|                      |        | Acc.↑       | MAE↓                |                    |
| Shampoo Plastic      | 3      | N/A         | 0.1003 $\pm$ 0.0410 | 0.6667             |
| Coconut Water Carton | 3      | N/A         | 0.1922 $\pm$ 0.1414 | 0.6667             |
| Almond Milk Carton   | 3      | N/A         | 0.2302 $\pm$ 0.2271 | 0.0000             |
| Tomato Juice Carton  | 3      | N/A         | 0.1978 $\pm$ 0.1087 | 0.6667             |
| Ananas Juice Carton  | 3      | N/A         | 0.0970 $\pm$ 0.0445 | 0.6667             |
| Rice Milk Carton     | 3      | N/A         | 0.0822 $\pm$ 0.0479 | 1.0000             |
| Energy Drink         | 3      | N/A         | 0.2534 $\pm$ 0.2142 | 0.0000             |
| Short Beer Can       | 3      | N/A         | 0.1149 $\pm$ 0.0893 | 0.3333             |
| Coke Can             | 3      | N/A         | 0.0612 $\pm$ 0.0290 | 1.0000             |
| Tall Beer Can        | 3      | N/A         | 0.1564 $\pm$ 0.0739 | 0.6667             |
| Pineapple Nectar Tin | 3      | N/A         | 0.2923 $\pm$ 0.1893 | 0.3333             |
| Green Tea Plastic    | 3      | N/A         | 0.1712 $\pm$ 0.1095 | 0.6667             |
| Oil Tin Can          | 3      | N/A         | 0.1310 $\pm$ 0.0600 | 0.6667             |
| Silver Vacuum flask  | 3      | N/A         | 0.0673 $\pm$ 0.0241 | 1.0000             |
| Black Vacuum flask   | 3      | N/A         | 0.1051 $\pm$ 0.0469 | 1.0000             |
| Champagne Glass      | 3      | N/A         | 0.2679 $\pm$ 0.2879 | 0.6667             |
| Orange Vacuum flask  | 3      | N/A         | 0.1664 $\pm$ 0.1558 | 1.0000             |
| Pitcher Vacuum flask | 3      | N/A         | 0.0953 $\pm$ 0.0369 | 1.0000             |
| Total:               | 54     | N/A         | 0.1546 $\pm$ 0.1503 | 0.6667             |

Table 6. Detailed results for the “(e) unseen liquid levels + ambient sound” test set. The second column shows the number of samples in the set for each container.

| Container          | #Samp. | Level Pred. |                     | Container<br>Acc.↑ |
|--------------------|--------|-------------|---------------------|--------------------|
|                    |        | Acc.↑       | MAE↓                |                    |
| Coke Can           | 12     | 1.0000      | 0.0077 $\pm$ 0.0105 | 1.0000             |
| Conditioner        | 12     | 0.8333      | 0.0701 $\pm$ 0.0923 | 0.7500             |
| Oatly              | 12     | 0.3333      | 0.1964 $\pm$ 0.2003 | 0.0833             |
| Contigo            | 12     | 0.4167      | 0.1415 $\pm$ 0.1319 | 1.0000             |
| Matte Vacuum Flask | 13     | 0.3846      | 0.3604 $\pm$ 0.3276 | 1.0000             |
| Total:             | 61     | 0.5902      | 0.1586 $\pm$ 0.2275 | 0.7705             |

Table 7. Detailed results for the “(f) unseen instances + ambient sound” test set. The second column shows the number of samples in the set for each container.

| Container            | #Samp. | Level Pred. |                     | Container<br>Acc.↑ |
|----------------------|--------|-------------|---------------------|--------------------|
|                      |        | Acc.↑       | MAE↓                |                    |
| Shampoo Plastic      | 96     | 1.0000      | 0.0077 $\pm 0.0106$ | 1.0000             |
| Coconut Water Carton | 96     | 1.0000      | 0.0078 $\pm 0.0107$ | 1.0000             |
| Almond Milk Carton   | 48     | 1.0000      | 0.0076 $\pm 0.0106$ | 1.0000             |
| Tomato Juice Carton  | 48     | 1.0000      | 0.0078 $\pm 0.0107$ | 1.0000             |
| Ananas Juice Carton  | 48     | 1.0000      | 0.0077 $\pm 0.0106$ | 1.0000             |
| Rice Milk Carton     | 42     | 1.0000      | 0.0078 $\pm 0.0107$ | 1.0000             |
| Energy Drink         | 42     | 1.0000      | 0.0078 $\pm 0.0108$ | 1.0000             |
| Short Beer Can       | 126    | 1.0000      | 0.0078 $\pm 0.0107$ | 1.0000             |
| Coke Can             | 576    | 1.0000      | 0.0078 $\pm 0.0107$ | 1.0000             |
| Tall Beer Can        | 42     | 1.0000      | 0.0079 $\pm 0.0107$ | 1.0000             |
| Pineapple Nectar Tin | 84     | 1.0000      | 0.0078 $\pm 0.0107$ | 1.0000             |
| Green Tea Plastic    | 84     | 1.0000      | 0.0078 $\pm 0.0107$ | 1.0000             |
| Oil Tin Can          | 48     | 1.0000      | 0.0077 $\pm 0.0108$ | 1.0000             |
| Silver Vacuum flask  | 96     | 1.0000      | 0.0077 $\pm 0.0106$ | 1.0000             |
| Black Vacuum flask   | 48     | 1.0000      | 0.0078 $\pm 0.0109$ | 1.0000             |
| Champagne Glass      | 42     | 1.0000      | 0.0077 $\pm 0.0108$ | 1.0000             |
| Orange Vacuum flask  | 126    | 1.0000      | 0.0078 $\pm 0.0107$ | 1.0000             |
| Pitcher Vacuum flask | 48     | 1.0000      | 0.0079 $\pm 0.0108$ | 1.0000             |
| Conditioner          | 420    | 1.0000      | 0.0078 $\pm 0.0107$ | 1.0000             |
| Oatly                | 480    | 1.0000      | 0.0078 $\pm 0.0107$ | 1.0000             |
| Contigo              | 252    | 1.0000      | 0.0078 $\pm 0.0107$ | 1.0000             |
| Matte Vacuum Flask   | 455    | 1.0000      | 0.0090 $\pm 0.0110$ | 1.0000             |
| Water Tank           | 180    | 1.0000      | 0.0078 $\pm 0.0106$ | 1.0000             |
| Total:               | 3527   | 1.0000      | 0.0079 $\pm 0.0107$ | 1.0000             |

Table 8. Evaluating the model on the training set. Our VibrationTransformer is expressive enough to fit the training data perfectly. The second column shows the number of samples in the set for each container.

| Test<br>Name                            | Full<br>Model   | Single Point    |                 |                 |
|-----------------------------------------|-----------------|-----------------|-----------------|-----------------|
|                                         |                 | Bottom          | Center          | Top             |
| (a) within distribution                 | 0.02 $\pm 0.05$ | 0.02 $\pm 0.05$ | 0.03 $\pm 0.07$ | 0.03 $\pm 0.07$ |
| (b) unseen instances                    | 0.09 $\pm 0.15$ | 0.12 $\pm 0.18$ | 0.11 $\pm 0.19$ | 0.14 $\pm 0.21$ |
| (f) unseen instances<br>+ ambient sound | 0.16 $\pm 0.21$ | 0.14 $\pm 0.16$ | 0.18 $\pm 0.21$ | 0.23 $\pm 0.25$ |

Table 9. Ablation study on liquid level prediction using MAE (chance  $\approx 0.30$ ). The full model is compared against variants using only a single measurement (bottom, center, or top). Results are reported for tests (a) within distribution, (b) unseen instances, and (f) unseen instances + ambient sound, demonstrating increased difficulty with each added challenge factor.

| Test name                          | Level Pred. |                     | Container<br>Acc. ↑ |
|------------------------------------|-------------|---------------------|---------------------|
|                                    | Acc. ↑      | MAE ↓               |                     |
| within distribution                | 0.9251      | 0.0315 $\pm 0.0802$ | 0.9957              |
| unseen instances                   | 0.7377      | 0.0909 $\pm 0.1546$ | 0.9781              |
| unseen liq. levels                 | N/A         | 0.1373 $\pm 0.1314$ | 0.7757              |
| ambient sound                      | 0.6949      | 0.1046 $\pm 0.1631$ | 0.8241              |
| unseen liq. levels + ambient sound | N/A         | 0.1554 $\pm 0.1137$ | 0.4630              |
| unseen instances + ambient sound   | 0.4426      | 0.2024 $\pm 0.2033$ | 0.8033              |

Table 10. Ablating for adding phase information. Instead of using only the *magnitude* of  $V_i$ , we trained a version of our network on a concatenation of magnitude and phase of  $V_i$ , resulting in patches of dimension 400 linearly projected to 512 tokens. Results show that adding phase information did not significantly contribute to the performance of the model.

| Test name                          | Level Pred.     |                     | Container       |
|------------------------------------|-----------------|---------------------|-----------------|
|                                    | Acc. $\uparrow$ | MAE $\downarrow$    | Acc. $\uparrow$ |
| within distribution                | 0.7911          | 0.0899 $\pm$ 0.1705 | 0.9438          |
| unseen instances                   | 0.7814          | 0.0989 $\pm$ 0.1926 | 0.9107          |
| unseen liq. levels                 | N/A             | 0.1930 $\pm$ 0.1771 | 0.6214          |
| ambient sound                      | 0.4009          | 0.2371 $\pm$ 0.2320 | 0.4922          |
| unseen liq. levels + ambient sound | N/A             | 0.1970 $\pm$ 0.1384 | 0.2222          |
| unseen instances + ambient sound   | 0.3934          | 0.2258 $\pm$ 0.2225 | 0.4918          |

Table 11. Ablating for working on the raw complex Fourier coefficients. We tested whether our PointTransformer can directly reason with the raw complex  $V_i$ . We trained a version of our network with a linear projection of the complex 200-dimension patches to real 512-dimensional tokens. Results show that the PointTransformer struggles to extract meaningful information from the raw complex signal.
